# Supplementary material for: Active behaviour of parents is more associated with out-of-school physical activity in their children
Source: Research Square preprint supplement (doi:10.21203/rs.3.rs-6727971/v1), 2025-06-04
Supplement: Supplementary file 1 [file 142779ee71d6ee03e535d8ec.docx]

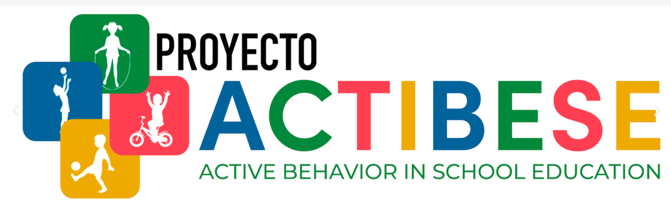


STUDENT QUESTIONNAIRE

**Hello, we are a group of researchers from the Pontificia Universidad Católica de Valparaíso and the Universidad de la Frontera, and we ask you to answer this questionnaire honestly. Your answers will help us to understand what is happening relation to physical activity at school.**

1. **Personal Information**
   1. Name and surname (capital letter)
   2. Name of the educational establishment
   3. Commune and Region

**1.4** Date of birth / / **1.5** Age **1.6** What grade you are in

**1.7** Biological Sex: Female
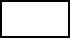
 Male
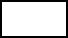
 **1.8** Date from today. / /

1. **Scale of Family Assets FAS III**

# Mark your answer with an "X".

- 1. Does your household own a car or other motorized vehicle? No
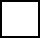
 Yes
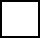
 How many?
  2. **
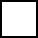

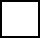
**Do you have your room? Yes No
  3. How many computers were purchased by your household (include desktop PCs, notebooks and tablets, do not include video game consoles or cell phones)?

None
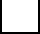
 One
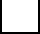
 Two
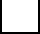
 Three Three
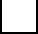
 More than
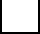


- 1. How many bathrooms (rooms with bath/shower or both) are there in your home? None One
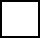
 Two
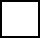
 More than
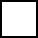


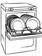

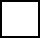

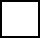


- 1. Does your family have a dishwasher (electric dishwasher)? No
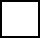
 Yes
  2. How many times have you and your family travelled out of the country for holidays/vacations within the last year? None One Two More than two


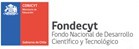

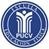

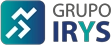

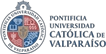


1. **
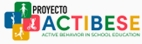
Scrolling mode**
   1. How do you usually commute to school? **Mark with an "X**

| Walking | Bike | Auto | Motorcycle | Micro-Bus | Metro/Train | Another |
| --- | --- | --- | --- | --- | --- | --- |


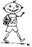

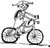

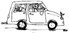

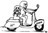


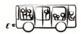

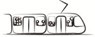


# IDA

- - 1. **RETURN**
  1. How far do you commute from home to school?

Less than 5 blocks

Between 5 to 10 blocks

Between 10 to 20 blocks

Between 20 to 30 blocks

Between 30 to 50 blocks

More than 50

blocks

- 1. How long does it take you to get from home to school?

Less 15 min From 15 to 30 min From 30 to 60 min More than 60

min

- 1. Who do you go to school with?

|  | With my father | With my mother | With my friends | With my grandparent | Alone | With neighbors | With my sibling | Another adult |
| --- | --- | --- | --- | --- | --- | --- | --- | --- |
| **3.4.1** GO |  |  |  |  |  |  |  |  |
| **3.4.2** RETURN |  |  |  |  |  |  |  |  |

1. **Youth Activity Profile (Youth Activity Profile - YAP)**
   1. How many days a week do you have Physical Education classes
   2. How many breaks do you have per day
   3. In general, do you enjoy physical activity?

Nothing Little Something Quite Much

- 1. Do you enjoy **Physical Education classes**?

Nothing Little Something Quite Much

- 1. **How many days** did you walk or bike to school? (If you don't remember exactly, try to (please indicate the most appropriate answer)

Zero (none) One day Two days Three days Four days Five days


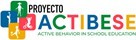


- 1. During **Physical Education classes**, how often were you running and moving around in games or activities organized by the teacher?

Very little time Short time More or less the

half the time

A long time Almost all the time

- 1. **During recess**, how often were you playing sports, walking, running, or actively playing?

Very little time Short time More or less the

half the time

A long time Almost all the time

- 1. During the **lunch break**, how often were you moving, walking or playing (if you did not have lunch breaks at school because there are no classes in the afternoon, choose "no lunch break")?

I had no rest to eat

Very little time

Little time

More or less the half the time

Much time

Almost all the time

- 1. Before starting school (between 6:00 a.m. and 8:00 a.m.), how many days did you do physical activity for at least 10 minutes (this includes activities done at home, school or , but does NOT include walking or biking to school)?

No day One day 2 days 3 days 4 days 5 days

- 1. After school hours at your school (and up to 18:00 hrs.), how many days did you do physical activity for at least 10 minutes (this includes activities such as playing with friends/family, sports or classes in which you do physical activity (such as sports workshops, but NOT walking or biking home from school)?

No day One day 2 days 3 days 4 days 5 days

- 1. In the evenings (between 18:00 and 22:00 hrs.), how many days did you do physical activity for at least 10 minutes (this includes activities such as playing with friends/family, team sports or classes in which you do physical activity (such as dance, swimming or other), but NOT walking or biking home from school).

No day One day 2 days 3 days 4 days 5 days


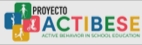


- 1. How much physical activity did you do over the weekend (this includes physical exercise, household chores, outings (walks) with family, sports, dancing, or playing games)? If you do not remember exactly, try to point out the most appropriate answer.

No physical activity

(0 min)

Very little physical activity (1-30 min)

An average amount of physical activity

(31-59 min)

A lot of physical activity (1-2 hours)

Many physical activities

(more than 2 hours)

- 1. On school days, how much time did you spend **watching TV** outside of school? time you were watching movies, series or sports, but NOT playing video games?

I did not watch anything on television

I watched television for less than 1 hour a day

I watched television for 1-2 hours a day

I watched TV for more than 2 to 3 hours a day

I watched the television for more than 3

- 1. How much time did you spend **playing video games** outside of school (including playing Nintendo Switch, Xbox, PlayStation, games on your cell phone, tablets/iPad or other consoles)? Do NOT include computer games.

I do not play video games

Less than 1 hour up to date

Between 1-2 hours a day

More than 2 hours and up to 3 hours per day

More than 3 hours up to date

- 1. How much time did you spend using **the computer** outside of school? tasks, but YES time on YouTube, chatting, playing video games, watching series, etc.).

I did not use the computer for these activities

Less than 1 hour per day

1-2 hours up to date

More than 2 hours and up to 3 hours a

day

More than 3 hours up to da

- 1. How much time were you **using your mobile (cell) phone** outside of school (include time spent talking on the phone, chatting, viewing TikTok, Instagram, etc.). If you do not have a phone and never use your parents' or a friend's phone, choose the option "never used cell phone".

I did not use the cell phone

Less than 1 hour per day

1-2 hours up to date

More than 2

hours and up to 3 hours a day

More than 3 hours a day

- 1. In your spare time, which of the following phrases best defines your **sedentary habits** at home? Sedentary habits = time spent sitting or lying awake in a typical week:

I am just sitting/lying

I am sitting/lying down for a short time

I am sitting/lying down an average amount

I have been sitting/lying for a long time

I am sitting/lying most of

the time

1. **Physical Fitness and Quality of Life Self-Assessment Questionnaire**

Think about your fitness level (compared to your friends) and choose the most suitable option appropriate for each question.

- 1. My general physical condition is:

Very bad Bad Acceptable Good Very good

- 1. My cardiorespiratory fitness (ability to exercise, e.g., running during a long ) is:

Very bad Bad Acceptable Good Very good

- 1. My muscle strength is:

Very bad Bad Acceptable Good Very good

- 1. My speed/agility is**:**

| Very bad | Mala | Acceptable Good | | Very good |
| --- | --- | --- | --- | --- |
|  |  |  |  |  |
| **5.5** My flexibility is: Very bad | Mala | Acceptable Good | | Very good |

1. **Family Support for Physical Activity Scale**

How often does **someone in your family**: (e.g., your father, mother, brother, sister, grandparent, or grandparent), your father, mother, brother, sister, grandparent, or grandparent? other family members).

**Mark with an "X".**

|  | Never (0) | Sometimes (1) | Regularly (2) | Almost always (3) | Always (4) |
| --- | --- | --- | --- | --- | --- |
| **6.1** Will you see how you practice physical activity or sport? |  |  |  |  |  |
| **6.2** Does it encourage you to do sport or physical activity? |  |  |  |  |  |
| **6.3** Does it transport you to a place where you can physical activity or sports? |  |  |  |  |  |
| **6.4** Does he/she do physical activity or sport with you? |  |  |  |  |  |
| **6.5** How often do you hear about the importance of physical activity? |  |  |  |  |  |

|  | Yes | No |
| --- | --- | --- |
| **6.6** Do you have sports equipment at home for physical activity (ball, jump rope, weights, elastic bands, etc.)? |  |  |

1. **Scale of friends' support for physical activity**

| **How often?** | Never (0) | Sometimes (1) | Regular  mind (2) | Almost  always (3) | Always (4) |
| --- | --- | --- | --- | --- | --- |
| **7.1** Your friends encourage you to play sports or physical activity. |  |  |  |  |  |
| **7.2** Your friends are physically active or play sport with you. |  |  |  |  |  |
| **7.3** Do your friends or classmates make fun of you because you are not good at physical activity or sports. |  |  |  |  |  |
| **7.4** Your friends tell you that you are doing well when you practice physical activity or sports. |  |  |  |  |  |

1. **Written evaluation of schoolchildren in some areas**

**Item 8.1: Alternative physical motor activities in the natural environment**

| According to the **alternative motor activities**, with How often do the following actions occur? | Never (0) | Sometimes (1) | Almost always (2) | Always (3) |
| --- | --- | --- | --- | --- |
| **8.1.1** In my establishment I have the opportunity to demonstrate alternative motor activities such as skateboarding, cycling, climbing, among others. |  |  |  |  |
| **8.1.2** In physical education classes I learn about alternative sports that I can practice outside of school in my free time. |  |  |  |  |
| **8.1.3** My educational establishment offers physical activities in contact with nature to be carried out on. |  |  |  |  |

**Item 8.2: Expressive-motor skills**

| **8.2** With respect to frequency for developing **motor expression**  activities, choose one alternative. | Never (0) | Sometimes (1) | Almost always (2) | Always (3) |
| --- | --- | --- | --- | --- |
| **8.2.1** During the classes I have the space to demonstrate my expressive skills such as traditional or contemporary dances. |  |  |  |  |
| **8.2.2** With what I have learned in class, I feel that I can participate recreationally in traditional Chilean dances. |  |  |  |  |
| **8.2.3** I can choose a popular, traditional or emerging motor expression activity to develop during class. |  |  |  |  |
| **8.2.4** I have the necessary equipment at the facility to prepare for or rehearse a motor expression or dance assessment. |  |  |  |  |

**Item 8.3: School policy and encourage**

| How much do you agree you agree with the following statements, regarding **physical or mental activities? sports that take place in your establishment**: | Very agreement | Agreement | Disagreement | Very in disagreement |
| --- | --- | --- | --- | --- |
| **8.3.1** In my educational establishment there are physical activity and sport programs of my interest. |  |  |  |  |
| **8.3.2** The majority of school's students are enrolled or participating in the sports activities offered. |  |  |  |  |
| **8.3.3** Most of the students like the sports activities offered by the school. |  |  |  |  |
| **8.3.4** In my educational institution, physical activities have a recreational purpose (the only important thing is to have a good time, to enjoy). |  |  |  |  |
| **8.3.5** In my educational establishment, physical activities have a competitive purpose (only winning and achievement are important). |  |  |  |  |
| **8.3.6** In my educational establishment, the purpose of physical activities is to achieve healthier living habits (feeling better). |  |  |  |  |
| **8.3.7** In my educational establishment, the physical activities do not have a defined purpose, they are improvised. |  |  |  |  |
| **8.3.8** During the year, physical activity promotion talks are organized for students at my educational establishment. |  |  |  |  |
| **8.3.9** In my physical education classes, we discuss about self-care habits. |  |  |  |  |
| **8.3.10** With my course we organize fairs for the promotion of the self-care habits. |  |  |  |  |
| **8.3.11** The educational establishment organizes for the parents and guardians of the children are given talks on self-care habits. |  |  |  |  |

**Item 8.4: Physical Education Didactics**

| **During the class of** Physical Education which frequency your teacher conducts the following actions? | Never (0) | Sometimes (1) | Almost always (2) | Always (3) |
| --- | --- | --- | --- | --- |
| **8.4.1** Explains the importance of exercising each time we we perform demanding physical activities. |  |  |  |  |
| **8.4.2** Explain the importance of physical exercise**.** for health. |  |  |  |  |
| **8.4.3** It offers assistance when physical exercises are difficult. |  |  |  |  |
| **8.4.4** Gives us advice on how to take care of our own body and we maintain a healthy life. |  |  |  |  |

**Item 8.5: Physical Education Didactics**

| 8.7 During the class of physical education with what frequency your teacher carries out the following actions? | Never (0) | Sometimes (1) | Almost always (2) | Always (3) |
| --- | --- | --- | --- | --- |
| **8.7.1** Explains the objective of the class and organizes the practical activities so that everyone participates. |  |  |  |  |
| **8.7.2** Respects individual differences and the effort of students. |  |  |  |  |
| **8.7.3** Inform in a timely manner y in advance the evaluations that are carried out in classes. |  |  |  |  |
| **8.7.4** Feedback is provided, and the results are explained. mistakes I make in the evaluations. |  |  |  |  |
| **8.7.5** Lessons are tailored to the needs and interests of students, when necessary. |  |  |  |  |
| **8.7.6** The class appears to be well planned and well organized. |  |  |  |  |

1. **Evaluation of school-based physical activity policies - Recreation and active recreation**

| **9.1** In what extent has the students’ opportunities to **participate in active recreation** in your school? For example: | Very agreement | Agreement | Disagreement | Very in disagreement |
| --- | --- | --- | --- | --- |
| **9.1.1** Is active recreation scheduled daily in the school day? |  |  |  |  |
| **9.1.2** Is there a playground or space open safe to play? |  |  |  |  |
| **9.1.3** Is equitable access to safe spaces and equipment provided for all students? |  |  |  |  |
| **9.1.4** Is there any fixed and mobile equipment that the can be used during breaks? |  |  |  |  |
| **9.1.5** Is there sufficient equipment to ensure that all students to be active? |  |  |  |  |
| **9.1.6** Are there possibilities for students to be active even in bad weather (rain, cold, heat)? |  |  |  |  |
| **9.1.7** Are there any activities organized for the students during recess? |  |  |  |  |
| **9.1.8** Are there adults or peer leaders supervising the activities? |  |  |  |  |
| **9.1.9** Are there challenges based on physical activity in which students can participate? |  |  |  |  |


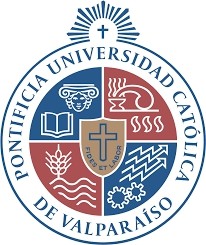

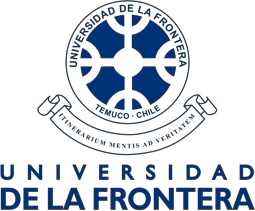


**
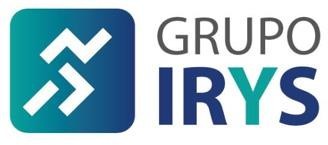

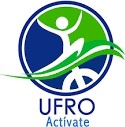
**


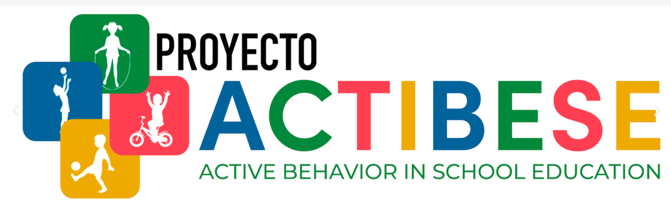


# Thank you very much for participating and helping us!

Project funded by the National Agency for Research and Development (ANID).

Fondecyt Regular 2023 nº 1230801 Email:

[fernando.rodriguez@pucv.cl](mailto:fernando.rodriguez@pucv.cl) Phone: +569

63881511 / +569 84442828
