# Supplementary material for: Active behaviour of parents is more associated with out-of-school physical activity in their children
Source: Research Square preprint supplement (doi:10.21203/rs.3.rs-6727971/v1), 2025-06-04
Supplement: Supplementary file 2 [file 1b42599084a820deccdb45ba.docx]

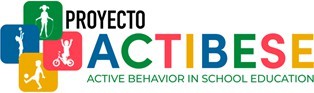


PARENT/GUARDIAN QUESTIONNAIRE

# Dear parent/guardian, we are a group of researchers from the Pontificia Universidad Católica de Valparaíso and the Universidad de la Frontera, and we ask you to answer this questionnaire honestly. Your answers help us to understand what is happening concerning physical activity at school and how to improve this behavior in your children.

1. **Personal Information**
   1. First and last name
   2. Date of birth / / **1.3** Age:
   3. Gender: (male, female, other: specify).
   4. Residence Address
   5. Commune and Region **1.7** Today's Date: / /
   6. Name of the child's educational institution
   7. Type of facility your child attends (indicate by marking with an "**X**") Public Private Subsidized Private Paid
   8. Your child's (ward's) first and last name:
   9. Your child's (ward's) school year:
   10. How many school-age children live in your household?
   11. What is your relationship to the child?

Parent Grandparent Aunt/Uncle Sibling Caregiver Other

- 1. What is the **highest level of education** you have (indicate by marking with an "X")?

No education Primary Secondary Professional University

Mother/Proxy Parent/Guardian


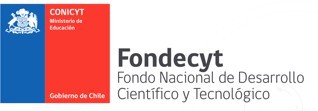

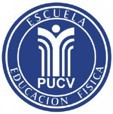

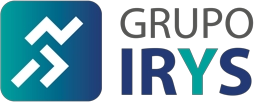

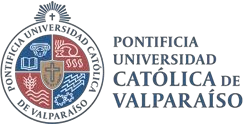


# Commuting mode

Indicate (by marking with an "X") one of the following options

- 1. How do you usually get from home to work?


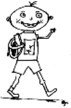

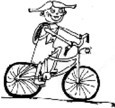
Walking Bike Car Moto


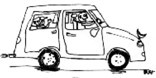

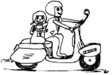


## GO

- - 1. **RETURN**

Bus Metro/Train I don’t Move


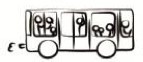

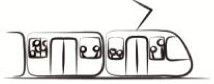


- 1. **How far do you commute from home to work?**

< 0.5 km 0.5 to 1 km 1 to 2 km 2 to 3 km 3 to 5 km > 5 km

- 1. **How long does it take you to get from home to work?**

< 15 min 15 to 30 min 30 to 60 min > 60 min

# International Physical Activity Questionnaire (IPAQ)

Next, you will be asked about the **time** you spent doing different **types of physical activity**.

You are requested to try to answer the questions even if you do not consider yourself an active person.

"**Intense physical activities**" refer to those that involve **significant physical exertion** and cause a large acceleration of breathing or heart rate to the point that you cannot carry on a smooth conversation (lifting weights, intense aerobic exercise, fitness, competitive sports, heavy construction work, etc.).

- 1. How many DAYS a week do you do **VIGOROUS** physical activities?

days.

- 1. On those days you do **VIGOROUS** physical activities, how much TIME do you usually spend on those activities?

minutes.

**Moderate-intensity physical activities** are those that involve moderate physical exertion and cause accelerated breathing or heart rate (brisk walking, carrying medium weights, aerobic exercise, etc.).

- 1. In a typical week, how many DAYS do you engage in **MODERATE** intensity activities?

days.

- 1. On one of those days when you engage in physical activities of **MODERATE** intensity, how much time do you usually spend on those activities?

minutes.

- 1. The next question asks how much time you **usually spend sitting or lying down**. For example, sitting at a desk at work, sitting with friends, travelling by bus or train, playing cards or watching television, not including time spent sleeping.

How much **TIME** (in hours) do you usually spend sitting or lying down on a typical day?

hours.

# Physical Fitness and Quality of Life Self-Assessment Questionnaire

Think about your fitness level (compared to your friends) and choose the most appropriate option. for each question.

- 1. My general physical condition is:

Very bad Bad Acceptable Good Very good

- 1. My cardiorespiratory fitness (ability to exercise, e.g., run for a long time) is:

Very bad Bad Acceptable Good Very good

- 1. My muscle strength is:

Very bad Bad Acceptable Good Very good

- 1. My speed/agility is**:**

| Very bad | Bad | Acceptable Good | | Very good |
| --- | --- | --- | --- | --- |
|  |  |  |  |  |
| **4.5** My flexibility is: Very bad | Bad | Acceptable Good | | Very good |

1. **Scale of family support for physical activity.** Indicate (by marking with "X") the most appropriate option: During a typical week:

|  | Never (0) | sometimes (1) | Regularl y (2) | Almost always (3) | Always (4) |
| --- | --- | --- | --- | --- | --- |
| **5.1** Do you go to see your child when he or she is physically active?  or sport? |  |  |  |  |  |
| **5.2** Do you encourage your child to engage in sport or activity? physics? |  |  |  |  |  |
| **5.3** Do you transport your child to a place where he or she can physical activity or sports? |  |  |  |  |  |
| **5.4** Do you engage in physical activity or sports with your child? |  |  |  |  |  |
| **5.5** How often do you talk to your child about the importance of physical activity? |  |  |  |  |  |
| **5.6** Do you talk to your child about the benefits of physical activity or sports? |  |  |  |  |  |

| Indicate (by marking with an "X") the degree of agreement that shows with the following statements: | Never  (0) | Sometimes  (1) | Almost always (2) | Always (4) |
| --- | --- | --- | --- | --- |
| **5.7** I spend some money during the weekend for my child to practice a sporting activity (I pay for him/her to attend a sport in general). |  |  |  |  |
| **5.8** I support my child's participation in any of the following activities sports activity that does not involve spending money. |  |  |  |  |
| **5.9** I accompany my child to sports facilities during the weekdays. |  |  |  |  |
| **5.10** I spend some money during the working days of the week for my child to practice a sport. |  |  |  |  |
| **5.11** During the weekend, I take my child to and pick him/her up from the place(s) where he/she practices a sport or physical activity. |  |  |  |  |
| **5.12** I encourage my child to physically active during the weekdays. |  |  |  |  |
| **5.13** I encourage my child to physically active during working days. |  |  |  |  |
| **5.14** I practice a good number of physical activities or sports during the weekend. |  |  |  |  |

|  | Never  (0) | Sometimes  (1) | Almost always (2) | Always (4) |
| --- | --- | --- | --- | --- |
| **5.15** I practice physical activities with my child during the weekend. |  |  |  |  |
| **5.16** I engage in physical activity with my child during the working days. |  |  |  |  |
| **5.17** I practice a good number of physical activitiesduring the working days of the week. |  |  |  |  |

|  | Very in disagreement | At disagreement | From agreement | Very agreement |
| --- | --- | --- | --- | --- |
| **5.18** I used to practice a good number of physical activities during the working days of the week, but now I no longer do so. |  |  |  |  |
| **5.19** I used to practice a good number of physical activities during the weekend, but now I no longer do so. |  |  |  |  |
| **5.20** I have workday rules for physical activity (e.g., being home at a certain time or not going to certain places). |  |  |  |  |
| **5.21** I have weekend rules for physical activity (e.g., being home at a certain time or not going to certain places). |  |  |  |  |


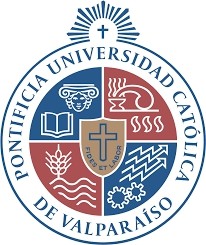

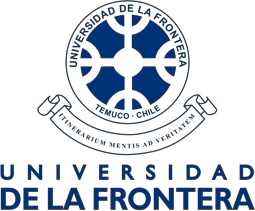

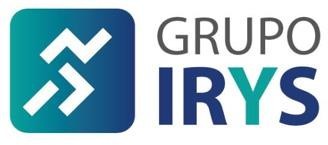

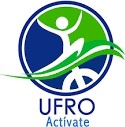


## Thank you very much for participating and helping us!

Project financed by the National Agency for Research and Development (ANID).

Fondecyt Regular 2023 nº 1230801 Email:

[fernando.rodriguez@pucv.cl](mailto:fernando.rodriguez@pucv.cl) Phone: +569

63881511 / +569 84442828
