# Supplementary material for: Active behaviour of parents is more associated with out-of-school physical activity in their children
Source: Research Square preprint supplement (doi:10.21203/rs.3.rs-6727971/v1), 2025-06-04
Supplement: Supplementary file 3 [file 8612097ed25cbe2641f4fc3e.docx]

**Supplementary material**

| **Table S1.** Sociodemographic characteristics of parents and their children according to imputed information. | | | |
| --- | --- | --- | --- |
| **Variables** | **Imputed data** | | **p-value***2* |
| **Non-imputed (n = 506)***1* | **Imputed (n = 506)***1* |
| Age (years), Mean (SD) | 42.01 (7.33) | 42.01 (7.33) | >0,999 |
| Sex parents, n (%) |  |  | >0,999 |
| Men | 111 (21.94%) | 111 (21.94%) |  |
| Women | 395 (78.06%) | 395 (78.06%) |  |
| MVPA (min/week), Mean (SD) | 465.90 (623.50) | 465.90 (623.50) | 0,994 |
| Age (years), Mean (SD) | 11.50 (2.60) | 11.67 (2.46) | 0,318 |
| Missing data (n) | 73 | 0 |  |
| Sex children, n (%) |  |  | 0,982 |
| Boys | 171 (33.86%) | 171 (33.79%) |  |
| Girls | 334 (66.14%) | 335 (66.21%) |  |
| Missing data (n) | 1 | 0 |  |
| School type, n (%) |  |  | >0,999 |
| Public | 239 (47.23%) | 239 (47.23%) |  |
| Private | 267 (52.77%) | 267 (52.77%) |  |
| In-school MVPA considering PE (min/day), n (%) |  |  | **0,008**** |
| <60 min/day | 169 (44.71%) | 272 (53.75%) |  |
| ≥60 min/day | 209 (55.29%) | 234 (46.25%) |  |
| Missing data (n) | 128 | 0 |  |
| In-school MVPA without considering PE (min/day), n (%) |  |  | 0,472 |
| <20 min/day | 116 (30.69%) | 144 (28.46%) |  |
| ≥20 min/day | 262 (69.31%) | 362 (71.54%) |  |
| Missing data (n) | 128 | 0 |  |
| Out-school MVPA (min/day), n (%) |  |  | **<0,001***** |
| <35 min/day | 177 (48.49%) | 318 (62.85%) |  |
| ≥35 min/day | 188 (51.51%) | 188 (37.15%) |  |
| Missing data (n) | 141 | 0 |  |
| *1* MVPA: moderate-to-vigorous physical activity; PE: physical education; SD: standard deviation. | | | |
| *2* *p<0.05; **p<0.01; ***p<0.001. | | | |

**Figure S1.** Lineal regression between MVPA of children in three different moments and MVPA of parents, overall and by sex.
